# Supplementary material
Source: Springer Nature journal article supplement (https://www.springermedizin.de/resource/supplementary/12885_2008_1309_MOESM9_ESM.pdf/9471718)

**TPC-1**

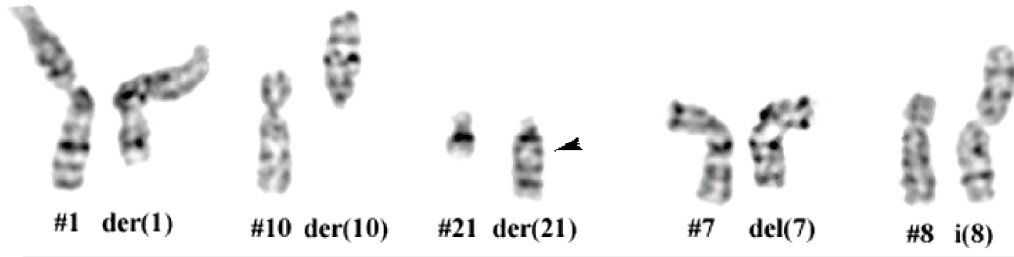

**FB2**

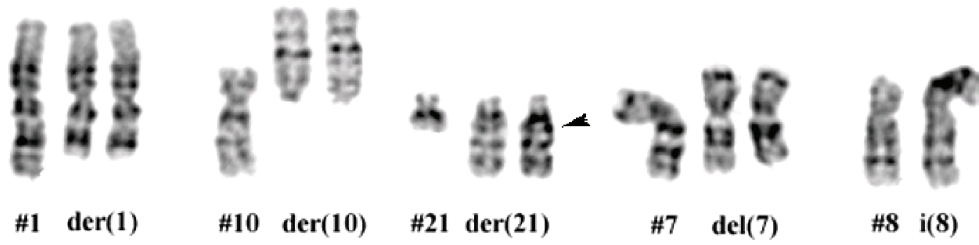

Supplement: MOESM9 [file 9471718]
